# Supplementary material for: Meta-analysis of microarray datasets identify several chromosome segregation-related cancer/testis genes potentially contributing to anaplastic thyroid carcinoma
Source: PeerJ. 2018 Oct 24;6:e5822. doi: 10.7717/peerj.5822 (PMC6203939; doi:10.7717/peerj.5822)
Supplement: Table S1 — Detailed information about included samples. Samples were labeled by accession numbers, datasets, platforms, histological classification and pipelines applied. [file peerj-06-5822-s001.xlsx]

## Sheet: Supplementary Table 1
Supplementary Table 1. Detailed information about included samples.
Dataset	Platform	Sample	Classification	Pipelines applied
GSE33630	GPL570	GSM831749	ATC	WGCNA only
GSE33630	GPL570	GSM831750	ATC	WGCNA only
GSE33630	GPL570	GSM831751	ATC	WGCNA only
GSE33630	GPL570	GSM831752	ATC	WGCNA only
GSE33630	GPL570	GSM831753	ATC	WGCNA only
GSE33630	GPL570	GSM831754	ATC	WGCNA only
GSE33630	GPL570	GSM831755	ATC	WGCNA only
GSE33630	GPL570	GSM831756	ATC	WGCNA only
GSE33630	GPL570	GSM831757	ATC	WGCNA only
GSE33630	GPL570	GSM831758	ATC	WGCNA only
GSE33630	GPL570	GSM831759	PTC	WGCNA only
GSE33630	GPL570	GSM831760	PTC	WGCNA only
GSE33630	GPL570	GSM831761	PTC	WGCNA only
GSE33630	GPL570	GSM831762	PTC	WGCNA only
GSE33630	GPL570	GSM831763	PTC	WGCNA only
GSE33630	GPL570	GSM831764	PTC	WGCNA only
GSE33630	GPL570	GSM831765	PTC	WGCNA only
GSE33630	GPL570	GSM831766	PTC	WGCNA only
GSE33630	GPL570	GSM831767	PTC	WGCNA only
GSE33630	GPL570	GSM831768	PTC	WGCNA only
GSE33630	GPL570	GSM831769	PTC	WGCNA only
GSE33630	GPL570	GSM831770	PTC	WGCNA only
GSE33630	GPL570	GSM831771	PTC	WGCNA only
GSE33630	GPL570	GSM831772	PTC	WGCNA only
GSE33630	GPL570	GSM831773	PTC	WGCNA only
GSE33630	GPL570	GSM831774	PTC	WGCNA only
GSE33630	GPL570	GSM831775	PTC	WGCNA only
GSE33630	GPL570	GSM831776	PTC	WGCNA only
GSE33630	GPL570	GSM831777	PTC	WGCNA only
GSE33630	GPL570	GSM831778	PTC	WGCNA only
GSE33630	GPL570	GSM831779	PTC	WGCNA only
GSE33630	GPL570	GSM831780	PTC	WGCNA only
GSE33630	GPL570	GSM831781	PTC	WGCNA only
GSE33630	GPL570	GSM831782	PTC	WGCNA only
GSE33630	GPL570	GSM831783	PTC	WGCNA only
GSE33630	GPL570	GSM831784	PTC	WGCNA only
GSE33630	GPL570	GSM831785	PTC	WGCNA only
GSE33630	GPL570	GSM831786	PTC	WGCNA only
GSE33630	GPL570	GSM831787	PTC	WGCNA only
GSE33630	GPL570	GSM831788	PTC	WGCNA only
GSE33630	GPL570	GSM831789	PTC	WGCNA only
GSE33630	GPL570	GSM831790	PTC	WGCNA only
GSE33630	GPL570	GSM831791	PTC	WGCNA only
GSE33630	GPL570	GSM831792	PTC	WGCNA only
GSE33630	GPL570	GSM831793	PTC	WGCNA only
GSE33630	GPL570	GSM831794	PTC	WGCNA only
GSE33630	GPL570	GSM831795	PTC	WGCNA only
GSE33630	GPL570	GSM831796	PTC	WGCNA only
GSE33630	GPL570	GSM831797	PTC	WGCNA only
GSE33630	GPL570	GSM831798	PTC	WGCNA only
GSE33630	GPL570	GSM831799	PTC	WGCNA only
GSE33630	GPL570	GSM831800	PTC	WGCNA only
GSE33630	GPL570	GSM831801	PTC	WGCNA only
GSE33630	GPL570	GSM831802	PTC	WGCNA only
GSE33630	GPL570	GSM831803	PTC	WGCNA only
GSE33630	GPL570	GSM831804	PTC	WGCNA only
GSE33630	GPL570	GSM831805	PTC	WGCNA only
GSE33630	GPL570	GSM831806	PTC	WGCNA only
GSE33630	GPL570	GSM831807	PTC	WGCNA only
GSE33630	GPL570	GSM831808	Normal	WGCNA only
GSE33630	GPL570	GSM831809	Normal	WGCNA only
GSE33630	GPL570	GSM831810	Normal	WGCNA only
GSE33630	GPL570	GSM831811	Normal	WGCNA only
GSE33630	GPL570	GSM831812	Normal	WGCNA only
GSE33630	GPL570	GSM831813	Normal	WGCNA only
GSE33630	GPL570	GSM831814	Normal	WGCNA only
GSE33630	GPL570	GSM831815	Normal	WGCNA only
GSE33630	GPL570	GSM831816	Normal	WGCNA only
GSE33630	GPL570	GSM831817	Normal	WGCNA only
GSE33630	GPL570	GSM831818	Normal	WGCNA only
GSE33630	GPL570	GSM831819	Normal	WGCNA only
GSE33630	GPL570	GSM831820	Normal	WGCNA only
GSE33630	GPL570	GSM831821	Normal	WGCNA only
GSE33630	GPL570	GSM831822	Normal	WGCNA only
GSE33630	GPL570	GSM831823	Normal	WGCNA only
GSE33630	GPL570	GSM831824	Normal	WGCNA only
GSE33630	GPL570	GSM831825	Normal	WGCNA only
GSE33630	GPL570	GSM831826	Normal	WGCNA only
GSE33630	GPL570	GSM831827	Normal	WGCNA only
GSE33630	GPL570	GSM831828	Normal	WGCNA only
GSE33630	GPL570	GSM831829	Normal	WGCNA only
GSE33630	GPL570	GSM831830	Normal	WGCNA only
GSE33630	GPL570	GSM831831	Normal	WGCNA only
GSE33630	GPL570	GSM831832	Normal	WGCNA only
GSE33630	GPL570	GSM831833	Normal	WGCNA only
GSE33630	GPL570	GSM831834	Normal	WGCNA only
GSE33630	GPL570	GSM831835	Normal	WGCNA only
GSE33630	GPL570	GSM831836	Normal	WGCNA only
GSE33630	GPL570	GSM831837	Normal	WGCNA only
GSE33630	GPL570	GSM831838	Normal	WGCNA only
GSE33630	GPL570	GSM831839	Normal	WGCNA only
GSE33630	GPL570	GSM831840	Normal	WGCNA only
GSE33630	GPL570	GSM831841	Normal	WGCNA only
GSE33630	GPL570	GSM831842	Normal	WGCNA only
GSE33630	GPL570	GSM831843	Normal	WGCNA only
GSE33630	GPL570	GSM831844	Normal	WGCNA only
GSE33630	GPL570	GSM831845	Normal	WGCNA only
GSE33630	GPL570	GSM831846	Normal	WGCNA only
GSE33630	GPL570	GSM831847	Normal	WGCNA only
GSE33630	GPL570	GSM831848	Normal	WGCNA only
GSE33630	GPL570	GSM831849	Normal	WGCNA only
GSE33630	GPL570	GSM831850	Normal	WGCNA only
GSE33630	GPL570	GSM831851	Normal	WGCNA only
GSE33630	GPL570	GSM831852	Normal	WGCNA only
GSE33630	GPL570	GSM831853	ATC	WGCNA only
GSE27155	GPL96	GSM671255	FTC	WGCNA only
GSE27155	GPL96	GSM671256	FTC	WGCNA only
GSE27155	GPL96	GSM671257	FTC	WGCNA only
GSE27155	GPL96	GSM671258	FTC	WGCNA only
GSE27155	GPL96	GSM671259	FTC	WGCNA only
GSE27155	GPL96	GSM671260	FTC	WGCNA only
GSE27155	GPL96	GSM671261	FTC	WGCNA only
GSE27155	GPL96	GSM671262	FTC	WGCNA only
GSE27155	GPL96	GSM671263	FTC	WGCNA only
GSE27155	GPL96	GSM671264	FTC	WGCNA only
GSE27155	GPL96	GSM671265	FTC	WGCNA only
GSE27155	GPL96	GSM671266	FTC	WGCNA only
GSE27155	GPL96	GSM671267	FTC	WGCNA only
GSE27155	GPL96	GSM671268	Normal	Both DEG filtering and WGCNA
GSE27155	GPL96	GSM671269	Normal	Both DEG filtering and WGCNA
GSE27155	GPL96	GSM671270	Normal	Both DEG filtering and WGCNA
GSE27155	GPL96	GSM671271	Normal	Both DEG filtering and WGCNA
GSE27155	GPL96	GSM671272	FTA	WGCNA only
GSE27155	GPL96	GSM671273	FTA	WGCNA only
GSE27155	GPL96	GSM671274	FTA	WGCNA only
GSE27155	GPL96	GSM671275	FTA	WGCNA only
GSE27155	GPL96	GSM671276	FTA	WGCNA only
GSE27155	GPL96	GSM671277	FTA	WGCNA only
GSE27155	GPL96	GSM671278	FTA	WGCNA only
GSE27155	GPL96	GSM671279	FTA	WGCNA only
GSE27155	GPL96	GSM671280	FTA	WGCNA only
GSE27155	GPL96	GSM671281	FTA	WGCNA only
GSE27155	GPL96	GSM671282	OTA	WGCNA only
GSE27155	GPL96	GSM671283	OTA	WGCNA only
GSE27155	GPL96	GSM671284	OTA	WGCNA only
GSE27155	GPL96	GSM671285	OTA	WGCNA only
GSE27155	GPL96	GSM671286	OTA	WGCNA only
GSE27155	GPL96	GSM671287	OTA	WGCNA only
GSE27155	GPL96	GSM671288	OTA	WGCNA only
GSE27155	GPL96	GSM671289	OTC	WGCNA only
GSE27155	GPL96	GSM671290	OTC	WGCNA only
GSE27155	GPL96	GSM671291	OTC	WGCNA only
GSE27155	GPL96	GSM671292	OTC	WGCNA only
GSE27155	GPL96	GSM671293	OTC	WGCNA only
GSE27155	GPL96	GSM671294	OTC	WGCNA only
GSE27155	GPL96	GSM671295	OTC	WGCNA only
GSE27155	GPL96	GSM671296	OTC	WGCNA only
GSE27155	GPL96	GSM671297	PTC	WGCNA only
GSE27155	GPL96	GSM671298	PTC	WGCNA only
GSE27155	GPL96	GSM671299	PTC	WGCNA only
GSE27155	GPL96	GSM671300	PTC	WGCNA only
GSE27155	GPL96	GSM671301	PTC	WGCNA only
GSE27155	GPL96	GSM671302	PTC	WGCNA only
GSE27155	GPL96	GSM671303	PTC	WGCNA only
GSE27155	GPL96	GSM671304	PTC	WGCNA only
GSE27155	GPL96	GSM671305	PTC	WGCNA only
GSE27155	GPL96	GSM671306	PTC	WGCNA only
GSE27155	GPL96	GSM671307	PTC	WGCNA only
GSE27155	GPL96	GSM671308	PTC	WGCNA only
GSE27155	GPL96	GSM671309	PTC	WGCNA only
GSE27155	GPL96	GSM671310	PTC	WGCNA only
GSE27155	GPL96	GSM671311	PTC	WGCNA only
GSE27155	GPL96	GSM671312	PTC	WGCNA only
GSE27155	GPL96	GSM671313	PTC	WGCNA only
GSE27155	GPL96	GSM671314	PTC	WGCNA only
GSE27155	GPL96	GSM671315	PTC	WGCNA only
GSE27155	GPL96	GSM671316	PTC	WGCNA only
GSE27155	GPL96	GSM671317	PTC	WGCNA only
GSE27155	GPL96	GSM671318	PTC	WGCNA only
GSE27155	GPL96	GSM671319	PTC	WGCNA only
GSE27155	GPL96	GSM671320	PTC	WGCNA only
GSE27155	GPL96	GSM671321	PTC	WGCNA only
GSE27155	GPL96	GSM671322	PTC	WGCNA only
GSE27155	GPL96	GSM671323	PTC	WGCNA only
GSE27155	GPL96	GSM671324	PTC	WGCNA only
GSE27155	GPL96	GSM671325	PTC	WGCNA only
GSE27155	GPL96	GSM671326	PTC	WGCNA only
GSE27155	GPL96	GSM671327	PTC	WGCNA only
GSE27155	GPL96	GSM671328	PTC	WGCNA only
GSE27155	GPL96	GSM671329	PTC	WGCNA only
GSE27155	GPL96	GSM671330	PTC	WGCNA only
GSE27155	GPL96	GSM671331	PTC	WGCNA only
GSE27155	GPL96	GSM671332	PTC	WGCNA only
GSE27155	GPL96	GSM671333	PTC	WGCNA only
GSE27155	GPL96	GSM671334	PTC	WGCNA only
GSE27155	GPL96	GSM671335	PTC	WGCNA only
GSE27155	GPL96	GSM671336	PTC	WGCNA only
GSE27155	GPL96	GSM671337	PTC	WGCNA only
GSE27155	GPL96	GSM671338	PTC	WGCNA only
GSE27155	GPL96	GSM671339	PTC	WGCNA only
GSE27155	GPL96	GSM671340	PTC	WGCNA only
GSE27155	GPL96	GSM671341	PTC	WGCNA only
GSE27155	GPL96	GSM671342	PTC	WGCNA only
GSE27155	GPL96	GSM671343	PTC	WGCNA only
GSE27155	GPL96	GSM671344	PTC	WGCNA only
GSE27155	GPL96	GSM671345	PTC	WGCNA only
GSE27155	GPL96	GSM671346	PTC	WGCNA only
GSE27155	GPL96	GSM671347	PTC	WGCNA only
GSE27155	GPL96	GSM671348	ATC	Both DEG filtering and WGCNA
GSE27155	GPL96	GSM671349	ATC	Both DEG filtering and WGCNA
GSE27155	GPL96	GSM671350	ATC	Both DEG filtering and WGCNA
GSE27155	GPL96	GSM671351	ATC	Both DEG filtering and WGCNA
GSE27155	GPL96	GSM671352	MTC	WGCNA only
GSE27155	GPL96	GSM671353	MTC	WGCNA only
GSE29265	GPL570	GSM723320	ATC	Both DEG filtering and WGCNA
GSE29265	GPL570	GSM723321	ATC	Both DEG filtering and WGCNA
GSE29265	GPL570	GSM723322	ATC	Both DEG filtering and WGCNA
GSE29265	GPL570	GSM723323	ATC	Both DEG filtering and WGCNA
GSE29265	GPL570	GSM723324	ATC	Both DEG filtering and WGCNA
GSE29265	GPL570	GSM723325	ATC	Both DEG filtering and WGCNA
GSE29265	GPL570	GSM723326	ATC	Both DEG filtering and WGCNA
GSE29265	GPL570	GSM723327	ATC	Both DEG filtering and WGCNA
GSE29265	GPL570	GSM723328	ATC	Both DEG filtering and WGCNA
GSE29265	GPL570	GSM723329	Normal	Both DEG filtering and WGCNA
GSE29265	GPL570	GSM723330	Normal	Both DEG filtering and WGCNA
GSE29265	GPL570	GSM723331	Normal	Both DEG filtering and WGCNA
GSE29265	GPL570	GSM723332	Normal	Both DEG filtering and WGCNA
GSE29265	GPL570	GSM723333	Normal	Both DEG filtering and WGCNA
GSE29265	GPL570	GSM723334	Normal	Both DEG filtering and WGCNA
GSE29265	GPL570	GSM723335	Normal	Both DEG filtering and WGCNA
GSE29265	GPL570	GSM723336	Normal	Both DEG filtering and WGCNA
GSE29265	GPL570	GSM723337	Normal	Both DEG filtering and WGCNA
GSE29265	GPL570	GSM723338	Normal	Both DEG filtering and WGCNA
GSE29265	GPL570	GSM723339	PTC	WGCNA only
GSE29265	GPL570	GSM723340	PTC	WGCNA only
GSE29265	GPL570	GSM723341	PTC	WGCNA only
GSE29265	GPL570	GSM723342	PTC	WGCNA only
GSE29265	GPL570	GSM723343	PTC	WGCNA only
GSE29265	GPL570	GSM723344	PTC	WGCNA only
GSE29265	GPL570	GSM723345	PTC	WGCNA only
GSE29265	GPL570	GSM723346	PTC	WGCNA only
GSE29265	GPL570	GSM723347	PTC	WGCNA only
GSE29265	GPL570	GSM723348	PTC	WGCNA only
GSE29265	GPL570	GSM723349	Normal	WGCNA only
GSE29265	GPL570	GSM723350	PTC	WGCNA only
GSE29265	GPL570	GSM723351	Normal	WGCNA only
GSE29265	GPL570	GSM723352	PTC	WGCNA only
GSE29265	GPL570	GSM723353	Normal	WGCNA only
GSE29265	GPL570	GSM723354	PTC	WGCNA only
GSE29265	GPL570	GSM723355	Normal	WGCNA only
GSE29265	GPL570	GSM723356	PTC	WGCNA only
GSE29265	GPL570	GSM723357	Normal	WGCNA only
GSE29265	GPL570	GSM723358	PTC	WGCNA only
GSE29265	GPL570	GSM723359	Normal	WGCNA only
GSE29265	GPL570	GSM723360	PTC	WGCNA only
GSE29265	GPL570	GSM723361	Normal	WGCNA only
GSE29265	GPL570	GSM723362	PTC	WGCNA only
GSE29265	GPL570	GSM723363	Normal	WGCNA only
GSE29265	GPL570	GSM723364	PTC	WGCNA only
GSE29265	GPL570	GSM723365	Normal	WGCNA only
GSE29265	GPL570	GSM723366	PTC	WGCNA only
GSE29265	GPL570	GSM723367	Normal	WGCNA only
GSE29265	GPL570	GSM723368	PTC	WGCNA only
GSE65144	GPL570	GSM1588026	ATC	Both DEG filtering and WGCNA
GSE65144	GPL570	GSM1588027	ATC	Both DEG filtering and WGCNA
GSE65144	GPL570	GSM1588028	ATC	Both DEG filtering and WGCNA
GSE65144	GPL570	GSM1588029	ATC	Both DEG filtering and WGCNA
GSE65144	GPL570	GSM1588030	ATC	Both DEG filtering and WGCNA
GSE65144	GPL570	GSM1588031	ATC	Both DEG filtering and WGCNA
GSE65144	GPL570	GSM1588032	ATC	Both DEG filtering and WGCNA
GSE65144	GPL570	GSM1588033	ATC	Both DEG filtering and WGCNA
GSE65144	GPL570	GSM1588034	ATC	Both DEG filtering and WGCNA
GSE65144	GPL570	GSM1588035	ATC	Both DEG filtering and WGCNA
GSE65144	GPL570	GSM1588036	ATC	Both DEG filtering and WGCNA
GSE65144	GPL570	GSM1588037	ATC	Both DEG filtering and WGCNA
GSE65144	GPL570	GSM1588038	Normal	Both DEG filtering and WGCNA
GSE65144	GPL570	GSM1588039	Normal	Both DEG filtering and WGCNA
GSE65144	GPL570	GSM1588040	Normal	Both DEG filtering and WGCNA
GSE65144	GPL570	GSM1588041	Normal	Both DEG filtering and WGCNA
GSE65144	GPL570	GSM1588042	Normal	Both DEG filtering and WGCNA
GSE65144	GPL570	GSM1588043	Normal	Both DEG filtering and WGCNA
GSE65144	GPL570	GSM1588044	Normal	Both DEG filtering and WGCNA
GSE65144	GPL570	GSM1588045	Normal	Both DEG filtering and WGCNA
GSE65144	GPL570	GSM1588046	Normal	Both DEG filtering and WGCNA
GSE65144	GPL570	GSM1588047	Normal	Both DEG filtering and WGCNA
GSE65144	GPL570	GSM1588048	Normal	Both DEG filtering and WGCNA
GSE65144	GPL570	GSM1588049	Normal	Both DEG filtering and WGCNA
GSE65144	GPL570	GSM1588050	Normal	Both DEG filtering and WGCNA
GSE76039	GPL570	GSM2024824	ATC	WGCNA only
GSE76039	GPL570	GSM2024825	ATC	WGCNA only
GSE76039	GPL570	GSM2024826	ATC	WGCNA only
GSE76039	GPL570	GSM2024827	PDTC	WGCNA only
GSE76039	GPL570	GSM2024828	PDTC	WGCNA only
GSE76039	GPL570	GSM2024829	PDTC	WGCNA only
GSE76039	GPL570	GSM2024830	PDTC	WGCNA only
GSE76039	GPL570	GSM2024831	ATC	WGCNA only
GSE76039	GPL570	GSM2024832	PDTC	WGCNA only
GSE76039	GPL570	GSM2024834	ATC	WGCNA only
GSE76039	GPL570	GSM2024836	ATC	WGCNA only
GSE76039	GPL570	GSM2024838	ATC	WGCNA only
GSE76039	GPL570	GSM2024839	ATC	WGCNA only
GSE76039	GPL570	GSM2024840	ATC	WGCNA only
GSE76039	GPL570	GSM2024842	PDTC	WGCNA only
GSE76039	GPL570	GSM2024844	PDTC	WGCNA only
GSE76039	GPL570	GSM2024845	ATC	WGCNA only
GSE76039	GPL570	GSM2024846	ATC	WGCNA only
GSE76039	GPL570	GSM2024847	ATC	WGCNA only
GSE76039	GPL570	GSM2024848	ATC	WGCNA only
GSE76039	GPL570	GSM2024849	PDTC	WGCNA only
GSE76039	GPL570	GSM2024850	PDTC	WGCNA only
GSE76039	GPL570	GSM2024851	ATC	WGCNA only
GSE76039	GPL570	GSM2024852	ATC	WGCNA only
GSE76039	GPL570	GSM2024853	ATC	WGCNA only
GSE76039	GPL570	GSM2024854	PDTC	WGCNA only
GSE76039	GPL570	GSM2024855	PDTC	WGCNA only
GSE76039	GPL570	GSM2024859	PDTC	WGCNA only
GSE76039	GPL570	GSM2024857	ATC	WGCNA only
