# Supplementary material for: Meta-analysis of microarray datasets identify several chromosome segregation-related cancer/testis genes potentially contributing to anaplastic thyroid carcinoma
Source: PeerJ. 2018 Oct 24;6:e5822. doi: 10.7717/peerj.5822 (PMC6203939; doi:10.7717/peerj.5822)
Supplement: Table S2 — This table recorded each DEGs’ combined effect size (combined ES), corresponding P values and Entrez ID. Negative combined ES means genes downregulated in ATC compared with normal thyroid tissues. [file peerj-06-5822-s002.xlsx]

## Sheet: Supplementary Table 2
Supplementary Table 2. Differentially expressed genes (DEGs) in ATC compared with normal/paracancerous thyroid tissues.
Entrez ID	Name	Combined ES	P value
2675	GFRA2	-3.715	3.2432e-11
53353	LRP1B	-3.8385	3.2432e-11
7802	DNALI1	-3.4601	4.6332e-11
762	CA4	-3.5364	4.6332e-11
1014	CDH16	-3.493	4.6332e-11
6540	SLC6A13	-3.4868	4.6332e-11
10370	CITED2	-3.4956	4.6332e-11
596	BCL2	-3.4702	4.9001e-11
1740	DLG2	-3.3866	5.4524e-11
5588	PRKCQ	-3.3246	9.7014e-11
4082	MARCKS	3.2152	1.4148e-10
5613	PRKX	-3.2115	1.4148e-10
23603	CORO1C	3.4409	1.4274e-10
3081	HGD	-3.2411	1.535e-10
7855	FZD5	-3.1545	1.6583e-10
7153	TOP2A	3.1264	2.6178e-10
79413	ZBED2	-3.0832	2.6178e-10
4830	NME1	3.0567	2.9299e-10
51155	HN1	3.0359	3.4541e-10
55859	BEX1	-3.0532	3.4541e-10
56992	KIF15	3.0596	3.4541e-10
11076	TPPP	-2.976	4.6802e-10
9352	TXNL1	-2.9499	5.3114e-10
8727	CTNNAL1	-2.9454	5.3114e-10
7849	PAX8	-2.9719	5.3922e-10
2263	FGFR2	-2.9571	6.68e-10
9319	TRIP13	2.9253	6.68e-10
9914	ATP2C2	-2.9139	6.68e-10
1408	CRY2	-2.8989	6.68e-10
27098	CLUL1	-2.9165	6.6867e-10
1365	CLDN3	-2.8735	7.7246e-10
395	ARHGAP6	-2.8862	8.7734e-10
206358	SLC36A1	2.8855	1.0428e-09
991	CDC20	2.8391	1.1225e-09
1063	CENPF	2.8148	1.2615e-09
24137	KIF4A	2.8029	1.2615e-09
10112	KIF20A	2.7992	1.2875e-09
2047	EPHB1	-2.947	1.3328e-09
9022	CLIC3	-2.8284	1.3328e-09
7905	REEP5	-2.805	1.3821e-09
9055	PRC1	2.785	1.4842e-09
332	BIRC5	2.7546	1.5308e-09
9833	MELK	2.7533	1.5308e-09
5033	P4HA1	2.7658	1.5308e-09
6510	SLC1A5	2.7996	1.5425e-09
53826	FXYD6	-2.7627	1.5425e-09
10184	LHFPL2	2.7398	1.6236e-09
5121	PCP4	-2.7519	1.7418e-09
51203	NUSAP1	2.7569	1.7418e-09
4093	SMAD9	-2.7445	1.7441e-09
55635	DEPDC1	2.7117	1.9264e-09
9630	GNA14	-2.7189	1.9698e-09
3815	KIT	-2.7183	1.971e-09
10602	CDC42EP3	2.6919	2.0262e-09
1894	ECT2	2.6987	2.0262e-09
55165	CEP55	2.6877	2.1096e-09
1188	CLCNKB	-2.8574	2.2233e-09
9768	KIAA0101	2.6789	2.3549e-09
78989	COLEC11	-2.6803	2.3549e-09
1203	CLN5	-2.7182	2.3682e-09
80763	C12orf39	-2.6981	2.3682e-09
1175	AP2S1	2.7504	2.4853e-09
7378	UPP1	2.6984	2.6556e-09
56271	BEX4	-2.6465	2.6556e-09
23787	MTCH1	-2.6662	2.6556e-09
64121	RRAGC	2.644	2.7711e-09
79071	ELOVL6	2.6205	3.4873e-09
23492	CBX7	-2.6557	3.6426e-09
8470	SORBS2	-2.6408	4.0669e-09
55081	IFT57	-2.5951	4.0669e-09
968	CD68	2.5862	4.2725e-09
55092	TMEM51	2.6021	4.4423e-09
7076	TIMP1	2.5952	4.7993e-09
9448	MAP4K4	2.5663	4.7993e-09
22974	TPX2	2.6033	4.7993e-09
8630	HSD17B6	-2.5822	4.9585e-09
55788	LMBRD1	-2.6161	5.0967e-09
55803	ADAP2	2.5636	5.1687e-09
2104	ESRRG	-2.5545	5.2009e-09
54502	RBM47	-2.5586	5.2009e-09
55215	FANCI	2.54	5.7865e-09
23554	TSPAN12	-2.5653	5.816e-09
8204	NRIP1	2.5524	5.9591e-09
4147	MATN2	-2.5345	5.9961e-09
7162	TPBG	2.5474	5.9965e-09
6468	FBXW4	-2.5647	5.9965e-09
6790	AURKA	2.5279	6.0171e-09
5516	PPP2CB	-2.5077	6.9291e-09
4753	NELL2	-2.6773	6.9291e-09
9180	OSMR	2.5457	6.9291e-09
9928	KIF14	2.5231	6.9291e-09
655	BMP7	-2.9818	6.9291e-09
8495	PPFIBP2	-2.5263	6.9291e-09
79886	C9orf82	-2.5293	6.9291e-09
6241	RRM2	2.5561	7.1769e-09
3759	KCNJ2	2.5053	7.2782e-09
9837	GINS1	2.4947	7.69e-09
55839	CENPN	2.5077	7.69e-09
7165	TPD52L2	2.4942	7.7973e-09
9133	CCNB2	2.4842	7.7973e-09
9787	DLGAP5	2.4903	7.7973e-09
51514	DTL	2.5002	7.7973e-09
79953	SYNDIG1	-2.5026	7.7973e-09
2166	FAAH	-2.4825	8.8479e-09
136	ADORA2B	2.7432	8.8576e-09
54855	FAM46C	-2.4679	8.8643e-09
55259	CASC1	-2.4546	9.9325e-09
55184	DZANK1	-2.472	1.0914e-08
9256	BZRAP1	-2.4445	1.1182e-08
11015	KDELR3	2.4533	1.1549e-08
4288	MKI67	2.4282	1.2216e-08
6470	SHMT1	-2.4491	1.2406e-08
9997	SCO2	2.418	1.3392e-08
6472	SHMT2	2.4295	1.3527e-08
1058	CENPA	2.419	1.3686e-08
55355	HJURP	2.4317	1.414e-08
50937	CDON	-2.4153	1.4231e-08
4751	NEK2	2.4281	1.4288e-08
8974	P4HA2	2.4254	1.4546e-08
1436	CSF1R	2.4025	1.4794e-08
55872	PBK	2.4005	1.4858e-08
23321	TRIM2	-2.401	1.6153e-08
7319	UBE2A	2.4068	1.6304e-08
140	ADORA3	2.4072	1.6545e-08
57447	NDRG2	-2.4226	1.6778e-08
427	ASAH1	-2.3929	1.7082e-08
2878	GPX3	-2.4018	1.7526e-08
55038	CDCA4	2.3788	1.7878e-08
288	ANK3	-2.3811	1.8055e-08
990	CDC6	2.3846	1.8398e-08
22978	NT5C2	-2.3741	1.8451e-08
79600	TCTN1	-2.401	1.8569e-08
56938	ARNTL2	2.3963	1.9039e-08
9555	H2AFY	2.3883	1.9455e-08
27255	CNTN6	-2.3824	1.9813e-08
7644	ZNF91	-2.3662	2.0458e-08
63876	PKNOX2	-2.3853	2.1065e-08
6715	SRD5A1	2.3814	2.2431e-08
55055	ZWILCH	2.3527	2.2688e-08
55268	ECHDC2	-2.3797	2.2688e-08
3925	STMN1	2.3551	2.3951e-08
2305	FOXM1	2.3479	2.3951e-08
8836	GGH	2.341	2.4034e-08
9991	PTBP3	2.3496	2.4034e-08
3486	IGFBP3	2.3677	2.4034e-08
79960	PHF17	-2.3415	2.4034e-08
1062	CENPE	2.3523	2.5031e-08
1908	EDN3	-2.4632	2.5031e-08
8260	NAA10	2.3371	2.5572e-08
81624	DIAPH3	2.6785	2.5572e-08
79770	TXNDC15	-2.3523	2.5958e-08
10849	CD3EAP	2.3341	2.6337e-08
55520	ELAC1	-2.3334	2.6814e-08
23382	AHCYL2	-2.339	2.6997e-08
9515	STXBP5L	-2.3336	2.6997e-08
757	TMEM50B	-2.3216	2.6997e-08
2331	FMOD	-2.3358	2.7709e-08
9882	TBC1D4	-2.3229	2.8561e-08
7272	TTK	2.3332	2.8892e-08
26050	SLITRK5	-2.3406	2.8892e-08
10742	RAI2	-2.3434	2.9366e-08
80705	TSGA10	-2.3134	2.9956e-08
7083	TK1	2.3172	3.0412e-08
5366	PMAIP1	2.3461	3.1235e-08
11004	KIF2C	2.2965	3.1654e-08
6338	SCNN1B	-2.3156	3.2202e-08
79891	ZNF671	-2.3013	3.2202e-08
29116	MYLIP	-2.3219	3.2202e-08
23171	GPD1L	-2.3067	3.2595e-08
25901	CCDC28A	-2.301	3.373e-08
6578	SLCO2A1	-2.276	3.7818e-08
50865	HEBP1	-2.4387	3.7818e-08
55034	MOCOS	2.2829	3.7818e-08
7298	TYMS	2.2868	4.0043e-08
890	CCNA2	2.2734	4.0043e-08
51741	WWOX	-2.2873	4.0468e-08
64175	LEPRE1	2.2791	4.0537e-08
9168	TMSB10	2.6177	4.1296e-08
79801	SHCBP1	2.2971	4.1695e-08
5831	PYCR1	2.4567	4.1701e-08
56242	ZNF253	-2.2822	4.2742e-08
7707	ZNF148	-2.2703	4.4576e-08
83450	LRRC48	-2.2531	4.4896e-08
23588	KLHDC2	-2.2498	4.4896e-08
123	PLIN2	2.2493	4.8882e-08
6282	S100A11	2.2807	4.9356e-08
55346	TCP11L1	2.2567	4.9523e-08
10643	IGF2BP3	2.2376	5.2226e-08
131544	CRYBG3	-2.2345	5.2226e-08
7097	TLR2	2.2684	5.231e-08
23363	OBSL1	-2.2636	5.3379e-08
80896	NPL	2.2363	5.3787e-08
22925	PLA2R1	-2.5344	5.4152e-08
3614	IMPDH1	2.2676	5.4687e-08
23594	ORC6	2.2266	5.4687e-08
10799	RPP40	2.2352	5.4844e-08
25825	BACE2	2.2296	5.6526e-08
57099	AVEN	2.2226	5.8151e-08
57214	KIAA1199	2.2129	6.1265e-08
10284	SAP18	-2.2538	6.1918e-08
1111	CHEK1	2.2263	6.2743e-08
3101	HK3	2.2471	6.2945e-08
657	BMPR1A	-2.2195	6.4464e-08
3992	FADS1	2.2236	6.5957e-08
51635	DHRS7	-2.2173	6.6584e-08
64151	NCAPG	2.2122	6.8113e-08
11201	POLI	-2.2166	6.8184e-08
64581	CLEC7A	2.2231	6.9371e-08
23345	SYNE1	-2.2035	6.9617e-08
25834	MGAT4C	-2.1939	7.4635e-08
6491	STIL	2.2317	7.4843e-08
1503	CTPS	2.1947	7.501e-08
65982	ZSCAN18	-2.1999	7.501e-08
135138	PACRG	-2.2025	7.8456e-08
51385	ZNF589	-2.1921	7.851e-08
80127	C14orf45	-2.2177	8.1894e-08
128872	HMGB3P1	2.1929	8.2187e-08
678	ZFP36L2	-2.1963	8.4241e-08
55143	CDCA8	2.1877	8.4294e-08
79836	LONRF3	-2.1896	8.5023e-08
55723	ASF1B	2.1738	9.0956e-08
5447	POR	-2.4986	9.2661e-08
10144	FAM13A	-2.1646	9.4685e-08
9121	SLC16A5	-2.1638	9.4685e-08
23528	ZNF281	2.1715	9.4685e-08
3161	HMMR	2.1622	9.5854e-08
5629	PROX1	-2.1658	9.5854e-08
6234	RPS28	-2.1767	9.5854e-08
23637	RABGAP1	-2.1879	9.8096e-08
55213	RCBTB1	-2.1734	1.0025e-07
4300	MLLT3	-2.1772	1.0106e-07
3693	ITGB5	2.1735	1.0523e-07
6732	SRPK1	2.1518	1.0523e-07
983	CDK1	2.162	1.0764e-07
81855	SFXN3	2.1772	1.0776e-07
9581	PREPL	-2.1681	1.0776e-07
64757	MARC1	-2.8256	1.1051e-07
5799	PTPRN2	-2.147	1.1051e-07
2149	F2R	2.1521	1.1176e-07
79844	ZDHHC11	-2.1436	1.1206e-07
23255	SOGA2	2.16	1.1314e-07
64895	PAPOLG	-2.1398	1.1373e-07
3091	HIF1A	2.1405	1.165e-07
124152	IQCK	-2.3161	1.1802e-07
4698	NDUFA5	-2.146	1.1814e-07
549	AUH	-2.1673	1.2288e-07
3590	IL11RA	-2.1331	1.2831e-07
26471	NUPR1	-2.1255	1.2831e-07
3772	KCNJ15	-2.1267	1.2831e-07
54959	ODAM	-2.1483	1.3042e-07
5427	POLE2	2.1507	1.3042e-07
11082	ESM1	2.118	1.3913e-07
79000	C1orf135	2.1289	1.3927e-07
4481	MSR1	2.135	1.3953e-07
9053	MAP7	-2.1313	1.4086e-07
54508	FLJ11235	-2.139	1.4093e-07
54566	EPB41L4B	-3.196	1.4157e-07
10797	MTHFD2	2.1495	1.4157e-07
83990	BRIP1	2.1174	1.4157e-07
4674	NAP1L2	-2.1244	1.4637e-07
4085	MAD2L1	2.1405	1.4798e-07
26278	SACS	2.1065	1.4798e-07
10962	MLLT11	2.106	1.4938e-07
9497	SLC4A7	2.1167	1.5325e-07
8671	SLC4A4	-2.1081	1.5529e-07
9949	AMMECR1	2.1198	1.5685e-07
220	ALDH1A3	2.1212	1.5739e-07
30851	TAX1BP3	2.6667	1.5739e-07
100	ADA	2.0994	1.6566e-07
4017	LOXL2	2.0944	1.703e-07
25802	LMOD1	-2.1107	1.703e-07
8091	HMGA2	2.0883	1.703e-07
124801	LSM12	2.0964	1.703e-07
8558	CDK10	-2.1108	1.703e-07
290	ANPEP	2.1021	1.7283e-07
7739	ZNF185	-2.098	1.7283e-07
51149	C5orf45	-2.7245	1.7324e-07
79885	HDAC11	-2.0878	1.7506e-07
9134	CCNE2	2.0967	1.7805e-07
10261	IGSF6	2.0926	1.7805e-07
4128	MAOA	-2.1073	1.7805e-07
11169	WDHD1	2.0882	1.7853e-07
51302	CYP39A1	-2.0977	1.7966e-07
8382	NME5	-2.3809	1.8382e-07
6897	TARS	2.0885	1.8659e-07
999	CDH1	-2.0909	1.8683e-07
2000	ELF4	2.0771	1.879e-07
3309	HSPA5	-2.0962	1.879e-07
9445	ITM2B	-2.1041	1.9119e-07
79161	C7orf23	-2.5299	1.9395e-07
5178	PEG3	-2.0687	2.0053e-07
5099	PCDH7	2.0916	2.0075e-07
10644	IGF2BP2	2.6412	2.0413e-07
2308	FOXO1	-2.0651	2.0483e-07
8936	WASF1	2.0713	2.0712e-07
27250	PDCD4	-2.6711	2.1189e-07
166647	GPR125	-2.078	2.1189e-07
8569	MKNK1	2.0895	2.1189e-07
10221	TRIB1	-2.0618	2.1375e-07
23316	CUX2	-2.0699	2.1375e-07
4189	DNAJB9	-2.0727	2.1508e-07
217	ALDH2	-2.0746	2.1778e-07
54209	TREM2	2.0735	2.1908e-07
84747	UNC119B	-2.0549	2.2086e-07
5351	PLOD1	2.0698	2.2153e-07
2015	EMR1	2.0557	2.2564e-07
3070	HELLS	2.0636	2.2574e-07
3295	HSD17B4	-2.0797	2.3386e-07
3673	ITGA2	2.0517	2.4289e-07
7846	TUBA1A	2.4059	2.4333e-07
6821	SUOX	-2.0666	2.4356e-07
7837	PXDN	3.6938	2.4356e-07
55347	ABHD10	-2.057	2.4538e-07
4886	NPY1R	-2.0634	2.4897e-07
50515	CHST11	2.0439	2.4897e-07
2769	GNA15	2.0377	2.5448e-07
2628	GATM	-2.0579	2.5753e-07
7881	KCNAB1	-2.1129	2.5965e-07
81558	FAM117A	-2.049	2.6714e-07
6374	CXCL5	2.0357	2.7111e-07
55711	FAR2	2.2504	2.7111e-07
11130	ZWINT	2.0449	2.7349e-07
64778	FNDC3B	2.0395	2.7349e-07
6464	SHC1	2.5927	2.7414e-07
10788	IQGAP2	-2.0513	2.7894e-07
51154	MRTO4	2.3564	2.7925e-07
55930	MYO5C	-2.5416	2.8597e-07
11160	ERLIN2	-2.0381	2.9363e-07
4485	MST1	-2.0529	2.9535e-07
51118	UTP11L	2.0362	3.0142e-07
5136	PDE1A	-2.048	3.1405e-07
65983	GRAMD3	-2.0214	3.2618e-07
55739	CARKD	-2.8432	3.333e-07
4521	NUDT1	2.0093	3.4885e-07
2237	FEN1	2.0252	3.5699e-07
79696	ZC2HC1C	-2.5582	3.585e-07
2662	GDF10	-2.0286	3.7394e-07
79642	ARSJ	2.0111	3.7394e-07
5373	PMM2	2.0278	3.7486e-07
80221	ACSF2	-2.0124	3.8911e-07
3399	ID3	-2.0166	3.8935e-07
5708	PSMD2	2.0172	3.9083e-07
4982	TNFRSF11B	-2.005	3.9315e-07
2053	EPHX2	-3.2678	3.9665e-07
27351	PPPDE2	2.0015	3.9742e-07
79080	CCDC86	2.0026	4.0123e-07
891	CCNB1	2.009	4.0158e-07
291	SLC25A4	-2.0165	4.1373e-07
51026	GOLT1B	2.0007	4.593e-07
146909	KIF18B	2.0007	4.6633e-07
51185	CRBN	-2.1264	4.9834e-07
11065	UBE2C	2.5626	5.3728e-07
57134	MAN1C1	-2.2334	5.8288e-07
25793	FBXO7	-2.4499	6.1668e-07
114882	OSBPL8	2.0926	6.3346e-07
259266	ASPM	2.6197	6.5689e-07
3131	HLF	-4.1449	6.6733e-07
4091	SMAD6	-2.4513	6.9381e-07
816	CAMK2B	-2.6963	6.98e-07
6383	SDC2	-2.1617	7.0384e-07
9645	MICAL2	2.2066	7.1491e-07
3653	IPW	-2.3908	8.7724e-07
23166	STAB1	2.3284	8.8273e-07
9104	RGN	-2.5214	8.8273e-07
9162	DGKI	-2.5957	1.0598e-06
216	ALDH1A1	-2.712	1.1038e-06
6297	SALL2	-2.8311	1.1554e-06
55556	ENOSF1	-2.6654	1.1796e-06
9493	KIF23	2.2854	1.3189e-06
1033	CDKN3	2.7007	1.3272e-06
9166	EBAG9	-2.3439	1.3698e-06
79656	BEND5	-2.0314	1.3813e-06
7371	UCK2	2.4258	1.4577e-06
79635	CCDC121	-2.0294	1.5613e-06
728	C5AR1	2.1963	1.6935e-06
65258	MPPE1	-2.4452	1.7368e-06
10652	YKT6	2.1598	1.782e-06
202559	KHDRBS2	-3.3004	1.9391e-06
6450	SH3BGR	-2.5688	2.2408e-06
2207	FCER1G	2.4135	2.2456e-06
8991	SELENBP1	-3.0168	2.4879e-06
127703	C1orf216	2.0755	2.6897e-06
4864	NPC1	2.2691	2.7207e-06
30835	CD209	2.1954	3.0965e-06
5912	RAP2B	2.2164	3.2518e-06
7111	TMOD1	-2.5933	3.4952e-06
6652	SORD	-4.5742	3.8444e-06
3300	DNAJB2	-2.1619	3.8726e-06
4915	NTRK2	-2.3998	4.082e-06
23314	SATB2	2.077	5.6871e-06
7507	XPA	-2.3576	6.0228e-06
87	ACTN1	2.5827	6.6354e-06
7046	TGFBR1	2.1872	6.8975e-06
2823	GPM6A	-3.2828	7.1543e-06
3678	ITGA5	2.5466	7.2948e-06
5898	RALA	3.0977	7.4183e-06
8715	NOL4	-2.2282	7.9426e-06
3838	KPNA2	2.9975	8.8484e-06
11332	ACOT7	2.2607	9.094e-06
10226	PLIN3	2.3592	9.801e-06
11345	GABARAPL2	-2.3398	9.87e-06
116984	ARAP2	-2.1691	9.9347e-06
7057	THBS1	2.0766	1.0148e-05
7280	TUBB2A	2.4878	1.0222e-05
960	CD44	2.0487	1.0246e-05
5909	RAP1GAP	-3.9184	1.1889e-05
3400	ID4	-2.8685	1.4016e-05
55027	HEATR3	2.1029	1.4116e-05
29118	DDX25	-3.2887	1.5225e-05
9737	GPRASP1	-2.5773	1.5805e-05
80144	FRAS1	-2.191	1.6153e-05
10529	NEBL	-2.6691	1.6892e-05
637	BID	2.3879	1.7251e-05
10981	RAB32	2.5998	1.7555e-05
2335	FN1	2.635	1.8901e-05
266977	GPR110	-2.0229	1.8915e-05
7305	TYROBP	2.0165	1.9715e-05
4059	BCAM	-2.0659	1.9785e-05
29940	DSE	2.2196	2.239e-05
6441	SFTPD	-2.5086	2.2582e-05
22856	CHSY1	2.3798	2.2589e-05
57136	C20orf3	-2.0658	2.2589e-05
29899	GPSM2	2.7804	2.313e-05
57037	ANKMY2	-2.0921	2.3392e-05
9073	CLDN8	-2.9489	2.371e-05
54478	FAM64A	2.5375	2.4399e-05
63976	PRDM16	-3.1281	2.4924e-05
4134	MAP4	2.1382	2.5328e-05
6575	SLC20A2	-2.6252	2.6776e-05
4016	LOXL1	2.0678	2.7903e-05
10268	RAMP3	-2.0944	2.8164e-05
10533	ATG7	2.4164	2.8266e-05
56898	BDH2	-2.6142	2.8367e-05
58473	PLEKHB1	-2.1158	2.9976e-05
18	ABAT	-2.5214	3.0265e-05
1804	DPP6	-3.6436	3.2088e-05
3784	KCNQ1	-2.5525	3.2194e-05
10396	ATP8A1	-2.9994	3.3476e-05
1849	DUSP7	2.0669	3.3831e-05
4173	MCM4	2.143	3.5928e-05
5037	PEBP1	-3.2248	3.6315e-05
90627	STARD13	-2.3758	3.6729e-05
871	SERPINH1	2.4259	3.7205e-05
138162	C9orf116	-2.3455	3.7268e-05
10903	MTMR11	2.3823	3.9725e-05
4948	OCA2	-2.8258	3.9942e-05
100506658	OCLN	-2.3667	3.9985e-05
2139	EYA2	-2.6373	4.0277e-05
9649	RALGPS1	-2.2146	4.5838e-05
6262	RYR2	-3.7498	4.5963e-05
6640	SNTA1	-2.4534	4.6457e-05
54830	NUP62CL	-2.5204	4.9718e-05
54970	TTC12	-2.0626	5.1373e-05
9912	ARHGAP44	-2.6059	5.1692e-05
10487	CAP1	2.3654	5.6001e-05
8416	ANXA9	-2.3163	5.8492e-05
1153	CIRBP	-2.564	6.185e-05
8565	YARS	2.1369	6.4577e-05
8857	FCGBP	-2.3022	6.5509e-05
79709	GLT25D1	2.8454	6.7445e-05
29127	RACGAP1	2.6072	6.8587e-05
10123	ARL4C	2.0251	7.1838e-05
64798	DEPTOR	-3.0391	7.2004e-05
6988	TCTA	-2.2022	7.2241e-05
2487	FRZB	-2.1686	7.4717e-05
5172	SLC26A4	-2.6114	7.4881e-05
858	CAV2	-2.2823	8.3603e-05
5361	PLXNA1	2.4629	8.4279e-05
10653	SPINT2	-2.0552	8.5069e-05
54996	MARC2	-2.9569	8.591e-05
6015	RING1	-2.7184	9.4911e-05
3087	HHEX	-2.8212	9.8872e-05
223	ALDH9A1	-2.2408	9.9719e-05
8100	IFT88	-2.195	0.00010134
7556	ZNF10	-2.029	0.00011523
26115	TANC2	2.1087	0.00011838
1734	DIO2	-3.2869	0.00012495
10404	CPQ	-2.9943	0.00012688
55592	GOLGA2P5	-2.2092	0.00013066
306	ANXA3	-2.1304	0.0001443
3927	LASP1	2.1843	0.00015152
9671	WSCD2	-2.5954	0.00015596
51093	RRNAD1	-2.1877	0.00017309
10769	PLK2	2.2421	0.0001749
57604	KIAA1456	-2.5873	0.00017908
11177	BAZ1A	2.1084	0.00019328
744	MPPED2	-2.8327	0.00019825
3983	ABLIM1	-2.351	0.00020128
8317	CDC7	2.3183	0.00020258
7915	ALDH5A1	-2.1993	0.00021148
5329	PLAUR	3.0225	0.00021485
29028	ATAD2	2.0571	0.00022286
3667	IRS1	-2.3359	0.00022569
1164	CKS2	3.0617	0.00022801
400451	FAM174B	-2.6308	0.0002401
55790	CSGALNACT1	-3.0369	0.00024403
9334	B4GALT5	2.9229	0.00026019
55076	TMEM45A	2.3057	0.00026685
6696	SPP1	2.1888	0.00026698
7295	TXN	2.0118	0.00027221
582	BBS1	-3.1592	0.00027581
5252	PHF1	-2.3778	0.0002781
4811	NID1	2.1038	0.0002889
701	BUB1B	2.9889	0.00028944
2597	GAPDH	2.2903	0.00029118
6574	SLC20A1	2.0465	0.00029376
6004	RGS16	-2.3506	0.0002979
2212	FCGR2A	2.7246	0.00031731
23014	FBXO21	-2.1079	0.00032045
33	ACADL	-2.9634	0.00032288
79758	DHRS12	-2.3059	0.00032558
282997	LOC282997	-2.7245	0.00033163
10057	ABCC5	2.0959	0.00033184
5965	RECQL	2.005	0.00035163
1381	CRABP1	-3.5026	0.00037639
1040	CDS1	-2.1459	0.0003938
54902	TTC19	-2.4153	0.00040713
80201	HKDC1	-2.2591	0.00041105
6566	SLC16A1	2.9346	0.00041256
1978	EIF4EBP1	3.267	0.00042121
4893	NRAS	2.1371	0.00042223
7033	TFF3	-3.8446	0.00042945
10457	GPNMB	2.1203	0.00043066
55700	MAP7D1	2.112	0.0004576
6819	SULT1C2	-2.5078	0.00048038
80157	CWH43	-2.6543	0.00048452
8877	SPHK1	2.8493	0.00049239
7045	TGFBI	3.6275	0.00051001
7172	TPMT	-2.3388	0.00052067
712	C1QA	2.3691	0.00052881
5360	PLTP	2.5308	0.00053999
4323	MMP14	2.7299	0.00056715
5154	PDGFA	2.9285	0.00056715
5202	PFDN2	2.5849	0.00057151
4306	NR3C2	-2.2596	0.00057515
23007	PLCH1	-2.5056	0.00058557
84525	HOPX	-2.4606	0.00059983
1289	COL5A1	3.1391	0.00063759
161291	TMEM30B	-2.4695	0.00063996
2617	GARS	2.6695	0.00065273
7080	NKX2-1	-2.355	0.00066799
7923	HSD17B8	-2.8915	0.00069391
7561	ZNF14	-2.834	0.00069833
8228	PNPLA4	-2.3184	0.00070843
54494	C11orf71	-2.1581	0.0007237
64284	RAB17	-3.1337	0.00074305
771	CA12	2.1476	0.00074648
120	ADD3	-2.013	0.0007495
79038	ZFYVE21	-2.3456	0.00075551
9103	FCGR2C	2.2261	0.00081039
23623	RUSC1	2.4197	0.00082345
24147	FJX1	2.4716	0.00082838
3773	KCNJ16	-2.4289	0.00083045
3556	IL1RAP	2.2466	0.000851
713	C1QB	2.3149	0.00089006
6319	SCD	2.6327	0.00092782
55713	ZNF334	-2.1496	0.00093468
1075	CTSC	2.2219	0.00094464
1462	VCAN	3.5959	0.00097305
201229	C17orf108	-3.3093	0.0010183
55379	LRRC59	2.1316	0.0010652
1230	CCR1	2.7331	0.0010668
64866	CDCP1	2.0955	0.0010828
27286	SRPX2	3.0303	0.0010842
5328	PLAU	3.1213	0.0010963
1192	CLIC1	2.3352	0.0011889
133	ADM	3.035	0.0012644
481	ATP1B1	-2.2668	0.0012717
23368	PPP1R13B	-2.9806	0.0013059
25840	METTL7A	-2.5992	0.0013095
25758	C11orf41	2.0539	0.0013568
7408	VASP	2.6057	0.0014771
2852	GPER	-2.7524	0.0015608
5054	SERPINE1	2.4155	0.0015738
9413	FAM189A2	-3.2227	0.0015864
7132	TNFRSF1A	2.186	0.0016162
81932	HDHD3	-2.0898	0.0017303
4175	MCM6	2.0268	0.0017408
2014	EMP3	2.2718	0.0017445
1893	ECM1	2.525	0.0018533
6505	SLC1A1	-2.8025	0.0019237
8622	PDE8B	-2.4958	0.0019773
65110	UPF3A	-2.2055	0.001984
3269	HRH1	2.6251	0.0020174
100505761	LOC100505761	-2.4679	0.0020581
1285	COL4A3	-2.3633	0.0020581
5355	PLP2	2.471	0.002083
4052	LTBP1	2.2313	0.0021069
9470	EIF4E2	2.039	0.0021117
9462	RASAL2	2.0957	0.0021485
6614	SIGLEC1	2.0882	0.0021517
3712	IVD	-2.4062	0.0021951
4312	MMP1	2.7167	0.0022546
2782	GNB1	2.0262	0.0022546
79698	ZMAT4	-2.444	0.0023133
4072	EPCAM	-2.0495	0.0023196
50506	DUOX2	-2.9187	0.0023613
92482	BBIP1	-2.2429	0.0024967
8436	SDPR	-2.7266	0.002537
5223	PGAM1	2.3834	0.0025575
7163	TPD52	-2.1393	0.0026183
7038	TG	-2.6486	0.0026504
6240	RRM1	2.3502	0.002752
23312	DMXL2	2.1645	0.0027525
5216	PFN1	2.1258	0.0027566
9844	ELMO1	-2.4736	0.0027608
10051	SMC4	2.3181	0.0027708
5062	PAK2	2.2836	0.0028057
10484	SEC23A	2.2152	0.0028093
29766	TMOD3	2.1113	0.0028195
140597	TCEAL2	-3.4963	0.0028804
83442	SH3BGRL3	2.1751	0.0029025
8613	PPAP2B	-2.6845	0.003028
26034	IPCEF1	-4.0843	0.0031583
22941	SHANK2	-2.2873	0.0032503
5688	PSMA7	2.7528	0.0032533
5087	PBX1	-2.2436	0.0033264
3987	LIMS1	2.0444	0.0035048
79442	LRRC2	-3.0276	0.0036531
51090	PLLP	-2.3108	0.0036691
7058	THBS2	2.7032	0.0036782
5412	UBL3	-2.2861	0.0037777
476	ATP1A1	-2.3655	0.0038043
8490	RGS5	-2.063	0.0040024
54541	DDIT4	2.0606	0.0040128
6675	UAP1	2.7883	0.0041183
26205	GMEB2	-2.0785	0.0045309
1277	COL1A1	3.0399	0.0046539
22998	LIMCH1	-2.1444	0.0047326
1039	CDR2	-2.3228	0.0047665
8424	BBOX1	-2.8919	0.0049134
1278	COL1A2	3.3204	0.0051491
2773	GNAI3	2.7115	0.0052359
7173	TPO	-3.0327	0.0054039
586	BCAT1	2.7168	0.0055296
79070	KDELC1	2.4613	0.0055383
2582	GALE	2.0782	0.0057543
56675	NRIP3	2.086	0.0059498
205	AK4	2.4256	0.0060278
4860	PNP	2.0278	0.0061952
55127	HEATR1	2.1141	0.0063089
54836	BSPRY	-2.7818	0.0065706
26064	RAI14	2.3181	0.0070629
7253	TSHR	-3.2811	0.0070799
10544	PROCR	2.2006	0.0071513
4311	MME	2.6647	0.0073322
5836	PYGL	2.7273	0.0077123
11072	DUSP14	-2.468	0.007829
2023	ENO1	2.6397	0.0081077
10891	PPARGC1A	-3.9897	0.0084139
2210	FCGR1B	2.1993	0.0085267
51338	MS4A4A	2.28	0.0087848
25907	TMEM158	2.5611	0.0088728
10090	UST	-2.408	0.0089115
9332	CD163	2.7771	0.0089684
9858	PPP1R26	-2.3167	0.009077
2304	FOXE1	-3.4462	0.0090879
6097	RORC	-2.0307	0.0090979
55753	OGDHL	-3.3365	0.0092324
7130	TNFAIP6	3.3775	0.0092398
10970	CKAP4	2.5782	0.009995
