# Supplementary material for: Meta-analysis of microarray datasets identify several chromosome segregation-related cancer/testis genes potentially contributing to anaplastic thyroid carcinoma
Source: PeerJ. 2018 Oct 24;6:e5822. doi: 10.7717/peerj.5822 (PMC6203939; doi:10.7717/peerj.5822)
Supplement: Table S3 — We applied KEGG pathway enrichment analysis to characterize each gene module (with P < 0.05; except module turquoise). All enriched pathways were recorded. We found no enrichment of any terms related to cell cycle directly. [file peerj-06-5822-s003.xlsx]

## Sheet: Supplementary Table 3
Supplementary Table 3. Pathway enrichment analysis of other modules with P < 0.05.
Module	Module Significance	P value of module significance	Enriched pathway(s)	Percentage	P value	Enriched Genes (EntreZ ID)	Fold Enrichment	FDR
Yellow	-0.27	2e-06	Focal adhesion	3.38681	0.000539109	595, 3672, 2318, 56034, 3680, 3691, 3694, 1499, 3918, 3675, 3914, 3679, 2534, 894, 3655, 4233, 5295, 10451, 896	2.49933	0.694081
			Arrhythmogenic right ventricular cardiomyopathy (ARVC)	1.78253	0.00107745	1756, 3675, 3672, 3679, 3680, 3691, 1829, 3655, 3694, 1499	3.81663	1.38274
			ECM-receptor interaction	1.96078	0.00124656	3918, 3675, 3672, 3914, 3679, 6385, 3680, 3691, 9900, 3655, 3694	3.42619	1.59815
			Cell adhesion molecules (CAMs)	2.49554	0.00208777	1272, 1001, 1002, 22871, 5792, 9071, 3680, 4897, 10686, 9076, 6385, 5797, 26047, 3655	2.67164	2.66328
			Dilated cardiomyopathy	1.78253	0.00351985	1756, 114, 3675, 3672, 3679, 5567, 3680, 3691, 3655, 3694	3.22596	4.45211
			PI3K-Akt signaling pathway	4.27807	0.00392181	595, 10161, 26281, 3672, 1946, 56034, 3680, 1902, 3691, 3694, 2791, 3918, 3675, 2246, 3914, 3679, 468, 894, 4804, 3655, 4233, 5295, 896, 2057	1.88508	4.94873
			MAPK signaling pathway	3.38681	0.00581688	4217, 7867, 26281, 3306, 4214, 5603, 2318, 3303, 5567, 5921, 6196, 6197, 6237, 2246, 10912, 468, 51295, 1848, 1846	2.01907	7.25814
			Amino sugar and nucleotide sugar metabolism	1.24777	0.00781237	3099, 9945, 2582, 10020, 10007, 29926, 91373	3.9518	9.63388
			Estrogen signaling pathway	1.78253	0.0102895	114, 3306, 468, 3710, 3303, 3709, 5567, 9568, 5295, 5580	2.73718	12.505
			Regulation of actin cytoskeleton	2.85205	0.0106778	26281, 3672, 56034, 3680, 3691, 3694, 6237, 3675, 2246, 1131, 8826, 3679, 7074, 3655, 5295, 10451	2.05483	12.9472
			Thyroid cancer	0.891266	0.0205458	595, 5979, 6258, 5468, 1499	4.67208	23.5195
			Cholinergic synapse	1.78253	0.0205811	2791, 114, 1131, 468, 3710, 3709, 5567, 2534, 3759, 5295	2.44126	23.555
			Pancreatic secretion	1.60428	0.0205914	114, 8399, 1131, 6558, 5322, 3710, 3709, 5645, 5644	2.62239	23.5654
			Transcriptional misregulation in cancer	2.31729	0.0206191	6258, 8091, 5468, 5090, 6692, 894, 4211, 4804, 2115, 4233, 2118, 4086, 2119	2.09687	23.5933
			Hypertrophic cardiomyopathy (HCM)	1.42602	0.0239832	1756, 3675, 3672, 3679, 3680, 3691, 3655, 3694	2.77929	26.9147
			Cyanoamino acid metabolism	0.534759	0.0250118	2687, 2678, 57733	11.6134	27.9033
			Neurotrophin signaling pathway	1.78253	0.0321209	4217, 6196, 6197, 4214, 468, 5603, 4804, 10782, 5295, 5580	2.25817	34.4058
			Proteoglycans in cancer	2.49554	0.0324403	595, 2065, 3710, 5603, 2318, 3709, 5567, 1499, 6237, 8826, 6385, 7074, 4233, 5295	1.89686	34.6848
			Long-term potentiation	1.24777	0.033572	6196, 6197, 114, 468, 3710, 3709, 5567	2.87403	35.6647
			Ras signaling pathway	2.6738	0.0384408	26281, 8399, 1946, 5322, 56034, 5567, 5921, 2791, 6237, 2246, 7074, 4804, 10156, 4233, 5295	1.79854	39.7276
			Axon guidance	1.78253	0.0437537	22885, 1946, 6405, 64221, 2043, 2534, 4233, 6585, 10154, 5921	2.1337	43.8901
			GnRH signaling pathway	1.42602	0.0494246	114, 4214, 468, 5603, 3710, 3709, 5567, 5580	2.38225	48.0393
			Glycerophospholipid metabolism	1.42602	0.0597715	56994, 8612, 8399, 55224, 5322, 56895, 23646, 129642	2.28194	54.889
			Glycerolipid metabolism	1.06952	0.0609689	8612, 4023, 56895, 219, 129642, 3990	2.80325	55.6254
			Inflammatory mediator regulation of TRP channels	1.42602	0.0683455	114, 5603, 3710, 3709, 5567, 5295, 5583, 5580	2.21208	59.9229
			Arachidonic acid metabolism	1.06952	0.0766933	2687, 2678, 8399, 5322, 8644, 247	2.62239	64.3213
			Ether lipid metabolism	0.891266	0.0821358	56994, 8612, 8399, 5322, 23646	3.01089	66.9443
			Pathways in cancer	3.74332	0.0851129	595, 10161, 26281, 114, 7039, 5567, 6258, 1902, 5468, 2737, 1499, 2791, 3918, 5979, 3675, 2246, 3914, 23604, 3655, 4233, 5295	1.44799	68.3027
			Renin secretion	1.06952	0.0853025	134, 3710, 3709, 5567, 3759, 1508	2.54044	68.3874
			Rap1 signaling pathway	2.31729	0.0854691	6237, 26281, 114, 1946, 2246, 5603, 7074, 56034, 1902, 4804, 5295, 4233, 1499	1.6775	68.4617
			Fc gamma R-mediated phagocytosis	1.24777	0.0879243	8853, 8612, 4651, 5295, 10451, 5580, 274	2.25817	69.538
			Small cell lung cancer	1.24777	0.0918545	595, 3918, 3675, 3914, 6258, 3655, 5295	2.2316	71.1905
			GABAergic synapse	1.24777	0.0918545	2791, 2561, 114, 66008, 5567, 9568, 6529	2.2316	71.1905
			Salivary secretion	1.24777	0.0958787	114, 1131, 6558, 3710, 3709, 5567, 362	2.20565	72.7965
			p53 signaling pathway	1.06952	0.0991251	595, 64065, 10912, 64393, 894, 896	2.42669	74.0315
			PPAR signaling pathway	1.06952	0.0991251	4023, 9370, 28965, 6258, 1622, 5468	2.42669	74.0315
Greenyellow	-0.13	0.02	Spliceosome	4.87805	0.0926291	55119, 58517	17.3183	41.2659
Purple	-0.31	4e-08	cGMP-PKG signaling pathway	9.30233	0.011493	4208, 1910, 3764, 5138	7.92886	10.9019
			Focal adhesion	9.30233	0.0204762	80310, 2321, 7450, 3791	6.38927	18.6651
			Rap1 signaling pathway	9.30233	0.0215392	80310, 2321, 3791, 11069	6.26757	19.5422
			Leukocyte transendothelial migration	6.97674	0.0449698	1003, 11069, 58494	8.36562	36.8382
			Cell adhesion molecules (CAMs)	6.97674	0.0625914	1003, 947, 58494	6.95171	47.557
			PI3K-Akt signaling pathway	9.30233	0.074953	80310, 2321, 7450, 3791	3.81504	54.0678
			Transcriptional misregulation in cancer	6.97674	0.0839007	4208, 2321, 4005	5.87585	58.3164
Tan	-0.23	5e-05	Osteoclast differentiation	15.3846	0.000186898	3725, 2354, 9021, 2353, 3727, 3726	10.5496	0.190322
			MAPK signaling pathway	17.9487	0.000552876	1843, 4616, 3725, 3164, 1647, 2353, 3727	6.32288	0.56206
			TNF signaling pathway	12.8205	0.000924842	3725, 6401, 9021, 2353, 3726	10.8648	0.9386
			Amphetamine addiction	10.2564	0.00254678	3725, 23237, 2354, 2353	13.9596	2.5655
			HTLV-I infection	15.3846	0.00384114	3725, 7538, 1959, 1958, 467, 2353	5.39844	3.84648
			FoxO signaling pathway	10.2564	0.0180328	4616, 1647, 10365, 6446	6.87562	16.9284
			Hepatitis B	10.2564	0.0221949	3725, 1959, 2353, 1960	6.35402	20.4479
Green	-0.44	4e-16	Protein processing in endoplasmic reticulum	2.29645	0.0104565	29978, 5602, 2923, 10961, 11231, 3998, 7095, 3326, 3703, 10294, 1603	2.55547	12.4092
			Sphingolipid metabolism	1.04384	0.0304425	427, 2720, 2581, 10558, 259230	4.17674	32.2723
			Lysosome	1.67015	0.0335064	427, 1203, 2720, 175, 2581, 950, 1519, 8763	2.59579	34.9211
			Fanconi anemia pathway	1.04384	0.0445247	11201, 51455, 80010, 6118, 55120	3.7039	43.6784
			Metabolic pathways	8.5595	0.049452	262, 51227, 55312, 2720, 2581, 178, 5634, 55256, 2746, 3703, 1603, 51084, 80146, 5281, 22929, 4534, 6391, 5440, 8790, 259230, 27034, 128, 4717, 2730, 26275, 3294, 9562, 3612, 427, 54981, 523, 4548, 8803, 51601, 29922, 1635, 10558, 549, 56267, 8706, 56922	1.31084	47.2317
			Peroxisome	1.25261	0.0587727	5825, 5824, 5191, 5194, 8800, 5193	2.83817	53.3952
			Selenocompound metabolism	0.626305	0.06763	22929, 4548, 56267	6.92848	58.6311
			Vasopressin-regulated water reabsorption	0.835073	0.0995529	51626, 10671, 361, 8766	3.56921	73.3335
Brown	0.31	4e-08	Graft-versus-host disease	3.52564	1.35956e-20	3126, 3113, 3115, 3112, 3117, 3135, 942, 3119, 7124, 5551, 3458, 3002, 3107, 3106, 3109, 3553, 3108, 3134, 3133, 3569, 3105, 3122	14.1744	1.73064e-17
			Allograft rejection	3.36538	1.09985e-17	3126, 3113, 958, 3115, 3112, 3117, 3135, 942, 3119, 7124, 5551, 3458, 3002, 3107, 3106, 3109, 3108, 3134, 3133, 3105, 3122	12.0674	1.40005e-14
			Cytokine-cytokine receptor interaction	7.37179	4.84081e-17	3627, 3561, 3560, 3606, 7124, 3604, 6347, 944, 8764, 1439, 1438, 50615, 6352, 10563, 6351, 3458, 3459, 4050, 6373, 3455, 729230, 7852, 608, 3579, 3553, 3575, 2833, 8600, 958, 3570, 3574, 7133, 939, 6387, 8807, 4283, 10663, 1234, 1235, 6363, 1236, 3566, 3587, 3569, 3588, 8809	4.25231	6.16206e-14
			Type I diabetes mellitus	3.36538	2.83343e-16	3126, 3113, 3115, 3112, 3117, 3135, 942, 3119, 7124, 5551, 3458, 3002, 3107, 3106, 3109, 3553, 3108, 3134, 3133, 3105, 3122	10.6308	4.21885e-13
			Herpes simplex infection	6.41026	4.53413e-16	3126, 3112, 6772, 6891, 7124, 6347, 6890, 8764, 4615, 7188, 6352, 3458, 3459, 3455, 3107, 3106, 3109, 3553, 3108, 3134, 3133, 3105, 23586, 4940, 3113, 3115, 3117, 3135, 3119, 10379, 972, 5199, 3717, 4938, 4939, 718, 4792, 3569, 3665, 3122	4.64733	5.66214e-13
			Inflammatory bowel disease (IBD)	3.84615	3.18399e-15	3113, 3126, 3115, 3112, 7100, 3117, 30009, 6775, 3119, 3561, 6772, 3606, 7124, 50615, 8807, 3458, 3459, 3109, 3553, 3566, 3108, 3569, 8809, 3122	7.97308	4.09672e-12
			Hematopoietic cell lineage	4.32692	4.28095e-15	3126, 7124, 925, 924, 1438, 3553, 3575, 3570, 930, 3574, 931, 951, 914, 933, 915, 916, 917, 910, 911, 1380, 912, 913, 1378, 909, 3566, 3569, 3122	6.75367	5.50671e-12
			Cell adhesion molecules (CAMs)	5.44872	6.0745e-15	3126, 3112, 942, 3384, 3385, 925, 3683, 5010, 29851, 3107, 3106, 3109, 3108, 3134, 3133, 3105, 3113, 958, 3115, 3117, 3135, 3119, 5175, 914, 933, 3695, 6402, 6403, 7412, 6404, 3689, 5788, 1493, 3122	5.09079	7.77156e-12
			Influenza A	5.92949	1.60541e-14	3126, 3627, 3112, 5579, 6772, 3606, 4599, 7124, 6347, 4615, 6352, 3458, 3459, 3455, 29108, 3109, 3553, 3108, 23586, 4940, 3113, 3115, 3117, 3119, 10379, 834, 3717, 4938, 4939, 5293, 51284, 5294, 4792, 3569, 91543, 3665, 3122	4.52113	2.04947e-11
			Intestinal immune network for IgA production	3.20513	7.04933e-14	3126, 3113, 958, 57379, 3115, 3112, 3117, 942, 3119, 3695, 6387, 29851, 7852, 608, 9020, 3109, 3108, 3569, 5284, 3122	9.04746	8.97393e-11
			Staphylococcus aureus infection	3.36538	1.11228e-13	3113, 3126, 3115, 3112, 3117, 3119, 3683, 5724, 6403, 716, 719, 6404, 718, 713, 3689, 712, 715, 3109, 3108, 629, 3122	8.26838	1.41609e-10
			Antigen processing and presentation	3.84615	2.23248e-13	3113, 3126, 3115, 3112, 3823, 3117, 3135, 3824, 3119, 7124, 6891, 925, 6890, 972, 3458, 1520, 3107, 3106, 3109, 3108, 3134, 3133, 3105, 3122	6.71417	2.84206e-10
			Viral myocarditis	3.36538	3.68066e-13	3126, 3113, 958, 5880, 3115, 3112, 3117, 3135, 942, 3119, 3683, 5551, 3689, 3107, 3106, 3109, 3108, 3134, 3133, 3105, 3122	7.8332	4.68492e-10
			Leishmaniasis	3.6859	4.39756e-13	3113, 3126, 3115, 3112, 3117, 4689, 3119, 6772, 7124, 3717, 4615, 3458, 3459, 718, 3689, 1378, 3109, 3553, 3108, 5777, 1535, 4792, 3122	6.88754	5.59786e-10
			Autoimmune thyroid disease	3.20513	6.22761e-13	3126, 3113, 958, 3115, 3112, 3117, 3135, 942, 3119, 5551, 3002, 3107, 3106, 3109, 3108, 3134, 3133, 3105, 1493, 3122	8.17751	7.92688e-10
			NF-kappa B signaling pathway	3.84615	5.24406e-12	7535, 695, 958, 597, 5971, 10892, 7124, 330, 4615, 7412, 6387, 7188, 6351, 6363, 5336, 4050, 7128, 9020, 3553, 4792, 3932, 4067, 23586, 8600	5.86525	6.67533e-09
			Rheumatoid arthritis	3.84615	6.80123e-12	3113, 3126, 3115, 3112, 3117, 942, 3119, 3606, 7124, 6347, 3683, 6387, 6352, 3458, 3689, 4050, 3109, 3553, 3108, 54, 3569, 8600, 1493, 3122	5.7986	8.65755e-09
			Primary immunodeficiency	2.5641	6.98626e-12	7535, 695, 958, 57379, 930, 3561, 6891, 915, 925, 916, 6890, 973, 29851, 3932, 5788, 3575	10.0054	8.89314e-09
			Malaria	2.88462	2.79841e-11	3820, 958, 5175, 3606, 7124, 6347, 3683, 6403, 4615, 7412, 3458, 22914, 3689, 1378, 3553, 2995, 3569, 2532	7.81036	3.5622e-08
			Osteoclast differentiation	4.48718	4.05291e-11	10859, 5971, 6772, 7124, 3458, 3459, 3455, 9020, 3553, 8600, 695, 814, 4689, 6688, 10379, 23547, 55423, 11025, 3937, 7305, 5293, 5336, 54, 5294, 1535, 4792, 1536, 3932	4.54445	5.15911e-08
			Phagosome	4.80769	6.48455e-11	3113, 3126, 3115, 3112, 3117, 4689, 3135, 11151, 3119, 6891, 6890, 8685, 79659, 4973, 718, 3689, 1780, 7277, 715, 1520, 3107, 3106, 3109, 3108, 1535, 3134, 1536, 3133, 3105, 3122	4.16893	8.25445e-08
			Chemokine signaling pathway	5.28846	9.11412e-11	3627, 113, 6772, 6347, 3702, 10563, 6352, 6351, 6375, 6373, 729230, 7852, 3579, 2833, 3055, 5880, 7409, 1794, 3717, 6362, 4283, 6387, 6361, 1234, 10663, 5293, 1235, 6363, 1236, 6367, 5294, 4792, 4067	3.77221	1.16017e-07
			T cell receptor signaling pathway	3.84615	2.1971e-10	7535, 10892, 7124, 7409, 915, 925, 916, 1326, 917, 3702, 3458, 3937, 5293, 919, 29851, 9020, 5777, 5294, 4792, 3932, 5788, 10125, 4794, 1493	4.95414	2.79678e-07
			Measles	4.32692	3.25332e-10	6772, 3561, 3560, 4599, 4615, 3458, 3459, 3455, 3553, 23586, 4940, 915, 916, 10379, 917, 6504, 3717, 4938, 4939, 5293, 7128, 51284, 5294, 4792, 3569, 4068, 3665	4.31625	4.14128e-07
			Natural killer cell mediated cytotoxicity	4.00641	1.40398e-09	7535, 5579, 3824, 7124, 3384, 962, 3683, 3458, 3459, 919, 3455, 5777, 5880, 7409, 5551, 3937, 5293, 7305, 22914, 3689, 5336, 3002, 5294, 3932, 4068	4.35687	1.78718e-06
			Tuberculosis	4.80769	2.38789e-09	3126, 3112, 11151, 4046, 6772, 10892, 3606, 7124, 4615, 3458, 3459, 7421, 1520, 3109, 3553, 3108, 3113, 3115, 3117, 3119, 972, 3717, 718, 3689, 1378, 7096, 3587, 3569, 3588, 3122	3.60365	3.03964e-06
			Toxoplasmosis	3.84615	3.77942e-09	3113, 3126, 958, 3115, 3112, 240, 3117, 3119, 6772, 7124, 330, 3717, 4615, 1234, 3458, 3459, 5293, 3109, 3108, 5294, 3587, 4792, 3588, 3122	4.32438	4.81097e-06
			HTLV-I infection	5.76923	7.26858e-09	3126, 3112, 5971, 113, 3561, 3560, 7124, 3683, 3107, 3106, 9020, 3109, 3108, 3134, 3133, 3105, 3113, 958, 3115, 3117, 3135, 3119, 6688, 915, 916, 917, 4602, 7412, 5293, 3689, 2113, 5294, 4792, 3932, 3569, 3122	2.9899	9.25247e-06
			Toll-like receptor signaling pathway	3.36538	7.19512e-08	958, 3627, 7100, 942, 6772, 7124, 1326, 4615, 6352, 4283, 6351, 5293, 6373, 3455, 7096, 3553, 51284, 5294, 4792, 3569, 3665	4.21219	9.15895e-05
			B cell receptor signaling pathway	2.72436	7.49697e-08	695, 27071, 5880, 930, 10892, 7409, 933, 971, 973, 1380, 5293, 5336, 5294, 5777, 4067, 4792, 4794	5.23835	9.54319e-05
			Asthma	1.76282	5.81079e-07	3126, 3113, 958, 3115, 3112, 3117, 3119, 7124, 3109, 3108, 3122	7.7959	0.000739675
			Jak-STAT signaling pathway	3.6859	8.65559e-07	3570, 6775, 3574, 6772, 3561, 3560, 10379, 1439, 3717, 1438, 50615, 3458, 5292, 5293, 3459, 3455, 3566, 5777, 5294, 3587, 3569, 3588, 3575	3.37252	0.0011018
			Leukocyte transendothelial migration	3.20513	1.97236e-06	5880, 7294, 4689, 5579, 5175, 7409, 3683, 3702, 7412, 6387, 5010, 5293, 5336, 3689, 7852, 399, 1535, 5294, 1536, 6494	3.60365	0.00251067
			Epstein-Barr virus infection	4.16667	2.35345e-06	5971, 3683, 7188, 3458, 3107, 9020, 3106, 3134, 3133, 23586, 3105, 958, 3135, 930, 6688, 952, 1380, 5293, 5336, 7128, 5294, 3587, 4067, 4792, 3588, 4794	2.90947	0.00299576
			Chagas disease (American trypanosomiasis)	2.88462	5.58218e-06	7124, 915, 6347, 916, 917, 6352, 4615, 3458, 5293, 3459, 718, 713, 712, 919, 3553, 5294, 4792, 3569	3.67988	0.00710554
			NOD-like receptor signaling pathway	2.08333	6.54199e-06	6352, 22861, 7128, 3606, 29108, 7124, 9051, 330, 6347, 3553, 834, 4792, 3569	5.02545	0.00832724
			Pertussis	2.40385	7.81678e-06	7124, 834, 3394, 4615, 716, 718, 713, 712, 3689, 715, 29108, 3659, 3553, 710, 3569	4.25231	0.00994984
			Salmonella infection	2.40385	2.62282e-05	391, 7100, 3606, 834, 79659, 4615, 3458, 6351, 3459, 1780, 10095, 29108, 3553, 3569, 5217	3.84245	0.0333818
			TNF signaling pathway	2.72436	2.96433e-05	3627, 7124, 330, 6347, 1326, 7133, 7412, 7188, 6352, 5293, 7128, 9020, 3553, 5294, 4792, 3569, 8809	3.40987	0.0377276
			Legionellosis	1.92308	3.17537e-05	4615, 718, 7100, 3689, 1378, 29108, 3606, 7124, 3553, 834, 4792, 3569	4.72479	0.040413
			African trypanosomiasis	1.44231	0.000106237	7412, 4615, 3458, 5579, 3606, 7124, 3553, 3620, 3569	5.7986	0.135149
			Systemic lupus erythematosus	2.88462	0.00015882	3113, 3126, 958, 3115, 3112, 3117, 942, 3119, 7124, 716, 3458, 718, 713, 712, 715, 3109, 3108, 3122	2.85603	0.20198
			Cytosolic DNA-sensing pathway	1.92308	0.000162034	6352, 3627, 6351, 9447, 29108, 3606, 3553, 834, 4792, 3569, 23586, 3665	3.98654	0.206063
			Fc gamma R-mediated phagocytosis	1.92308	0.0017533	5880, 5293, 5579, 5336, 10095, 7409, 5294, 4067, 5788, 1794, 3055, 8395	3.03736	2.20904
			Hepatitis C	2.40385	0.00365023	6772, 7124, 10379, 5010, 4938, 5293, 4939, 3455, 3659, 5294, 10062, 4792, 23586, 3665, 4940	2.39792	4.54834
			Fc epsilon RI signaling pathway	1.60256	0.00419401	695, 5880, 3937, 5293, 5579, 5336, 7124, 7409, 5294, 4067	3.1267	5.20936
			Complement and coagulation cascades	1.60256	0.00462969	716, 719, 718, 713, 712, 1378, 715, 710, 1380, 629	3.08138	5.73592
			HIF-1 signaling pathway	1.76282	0.0160788	3570, 3458, 5293, 3459, 5579, 5336, 5163, 3479, 5294, 1536, 3569	2.3865	18.6441
			Viral carcinogenesis	2.5641	0.057382	8379, 3135, 10379, 7188, 1234, 718, 5293, 3107, 3106, 3134, 5294, 4792, 4067, 3133, 3105, 3665	1.65944	52.8687
			Amoebiasis	1.60256	0.0600531	3458, 5293, 5579, 3689, 7124, 5272, 3553, 1287, 5294, 3569	2.00581	54.5408
			Prion diseases	0.801282	0.0666376	6352, 713, 712, 3553, 3569	3.22145	58.432
			Apoptosis	1.12179	0.0691945	5293, 7124, 9020, 330, 5294, 4792, 1439	2.4005	59.8585
			Inflammatory mediator regulation of TRP channels	1.44231	0.0881104	5293, 3357, 5579, 5336, 113, 5734, 3479, 3553, 5294	1.95259	69.0907
			Epithelial cell signaling in Helicobacter pylori infection	1.12179	0.0928931	6352, 1445, 5336, 9020, 3579, 4792, 4067	2.22135	71.092
			Endocytosis	2.88462	0.0969236	3135, 116987, 3561, 3560, 7456, 8395, 154, 1234, 10095, 3107, 2350, 7852, 3106, 3579, 23325, 3134, 3133, 3105	1.48336	72.6851
Magenta	0.3	9e-08	ECM-receptor interaction	10	0.000172925	1282, 1284, 3915, 3339, 3912	16.5469	0.159927
			Protein digestion and absorption	10	0.00018076	1306, 1282, 81578, 1284, 80781	16.3589	0.167168
			Small cell lung cancer	8	0.00266335	1282, 1284, 3915, 3912	13.549	2.43801
			Focal adhesion	10	0.00435151	1282, 4638, 1284, 3915, 3912	6.98827	3.95574
			Amoebiasis	8	0.0049707	1282, 1284, 3915, 3912	10.8648	4.50712
			Vascular smooth muscle contraction	8	0.00685927	2977, 59, 4638, 2983	9.67787	6.17147
			Renin secretion	6	0.0188526	2977, 358, 2983	13.4961	16.1505
			PI3K-Akt signaling pathway	10	0.0254644	1282, 1284, 3915, 3912, 285	4.17271	21.2369
			Platelet activation	6	0.0687214	2977, 4638, 2983	6.64423	48.2593
			Proximal tubule bicarbonate reclamation	4	0.0739305	760, 358	25.0362	50.8767
			Oxytocin signaling pathway	6	0.0961626	2977, 4638, 2983	5.46677	60.7702
Red	0.21	0.0003	Parkinson's disease	11.5942	4.09901e-11	54539, 1351, 9377, 506, 29796, 293, 4700, 292, 4711, 10105, 1537, 6389, 7388, 516, 7386, 7384	9.73239	4.43004e-08
			Oxidative phosphorylation	10.8696	2.06476e-10	54539, 1351, 9377, 506, 29796, 4700, 4711, 1537, 6389, 9114, 533, 7388, 516, 7386, 7384	9.74154	2.23151e-07
			Carbon metabolism	10.1449	3.1797e-10	5631, 6389, 1743, 29968, 5230, 226, 1431, 3419, 4191, 1737, 5214, 5213, 2821, 2805	10.7013	3.43648e-07
			Huntington's disease	11.5942	2.97943e-09	54539, 1351, 9377, 506, 29796, 293, 4700, 292, 4711, 10105, 1537, 6389, 7388, 516, 7386, 7384	7.19792	3.22005e-06
			Biosynthesis of antibiotics	11.5942	1.16376e-08	1743, 29968, 5230, 226, 1431, 4191, 1737, 5213, 2805, 435, 5631, 6389, 3419, 10606, 5214, 2821	6.51887	1.25775e-05
			Metabolic pathways	26.087	3.55587e-08	211, 54539, 1351, 29796, 1743, 5230, 1431, 191, 5213, 4700, 435, 533, 3419, 516, 5805, 9377, 506, 29968, 226, 4191, 1737, 2799, 2805, 4711, 2180, 5631, 1537, 6389, 9114, 10606, 873, 7388, 5214, 7386, 2821, 7384	2.53217	3.84304e-05
			Alzheimer's disease	10.1449	4.27077e-08	54539, 9377, 506, 1351, 29796, 4700, 4711, 1020, 1537, 6389, 7388, 516, 7386, 7384	7.19792	4.61567e-05
			Biosynthesis of amino acids	7.24638	1.27195e-07	435, 5631, 29968, 5230, 226, 1431, 3419, 5214, 5213, 2805	11.6723	0.000137467
			Non-alcoholic fatty liver disease (NAFLD)	7.97101	7.2937e-06	54539, 1351, 9377, 1537, 29796, 6389, 7388, 7386, 4700, 7384, 4711	6.29222	0.00788245
			Citrate cycle (TCA cycle)	4.34783	1.95849e-05	6389, 1743, 1431, 3419, 4191, 1737	17.275	0.0211645
			Cardiac muscle contraction	5.07246	0.000198257	1351, 9377, 1537, 29796, 7388, 7386, 7384	8.06167	0.214059
			Pentose phosphate pathway	3.62319	0.000302495	5631, 226, 5214, 5213, 2821	14.8922	0.32644
			Glycolysis / Gluconeogenesis	4.34783	0.00095439	5230, 226, 1737, 5214, 5213, 2821	7.73507	1.02665
			2-Oxocarboxylic acid metabolism	2.17391	0.0157059	1431, 3419, 2805	15.2426	15.7254
			Ribosome	4.34783	0.0193439	6227, 54948, 29088, 55173, 51081, 51121	3.81066	19.0315
			Vibrio cholerae infection	2.89855	0.0223748	9114, 11014, 533, 23480	6.51887	21.6954
			Fructose and mannose metabolism	2.17391	0.0513247	226, 5214, 5213	8.09766	43.4156
			RNA degradation	2.89855	0.0576054	3313, 57819, 5214, 5213	4.48701	47.3354
			Cysteine and methionine metabolism	2.17391	0.0696477	4191, 191, 2805	6.81908	54.1695
			Glycine, serine and threonine metabolism	2.17391	0.0728838	211, 63826, 29968	6.64423	55.8633
Blue	-0.48	3e-19	Valine, leucine and isoleucine degradation	1.71674	4.42644e-08	3712, 594, 1892, 223, 65985, 1738, 1962, 36, 217, 34, 501, 38, 3033, 4594, 4329, 593	5.68198	5.8166e-05
			Biosynthesis of antibiotics	3.32618	7.58989e-06	5160, 217, 8382, 34, 38, 9104, 2222, 3033, 4967, 2673, 3156, 10826, 3945, 4942, 594, 3098, 1892, 223, 5051, 2731, 1738, 9061, 1962, 55753, 501, 7941, 6307, 471, 875, 1491, 593	2.44064	0.0099731
			Metabolic pathways	11.588	1.31203e-05	686, 5167, 4697, 7498, 5160, 36, 3081, 33, 9245, 34, 38, 2954, 3156, 2650, 11019, 10826, 3712, 3098, 1892, 5743, 55753, 3293, 5033, 7941, 8309, 1594, 5832, 32, 5837, 471, 4594, 875, 1491, 7173, 216, 23530, 2628, 217, 8382, 55163, 3033, 9162, 622, 9197, 518, 4942, 3945, 515, 1119, 220, 594, 5050, 5051, 223, 1066, 51181, 54205, 6480, 23382, 526, 593, 2053, 23556, 9388, 9104, 57134, 4967, 2673, 4860…	1.46792	0.0172394
			beta-Alanine metabolism	1.07296	5.52497e-05	220, 1892, 1806, 223, 23417, 4329, 1962, 217, 34, 501	5.38414	0.0725769
			Tryptophan metabolism	1.18026	8.73423e-05	1892, 3033, 223, 4129, 4967, 1962, 55753, 217, 501, 1545, 38	4.58998	0.114712
			Propanoate metabolism	0.965665	0.000163621	1892, 23417, 4594, 32, 4329, 1962, 34, 3945, 38	5.36491	0.214794
			Fatty acid degradation	1.18026	0.000206124	1892, 3033, 223, 1962, 36, 217, 33, 1632, 34, 501, 38	4.17271	0.27052
			Thyroid hormone synthesis	1.39485	0.000794072	7849, 64764, 9601, 3708, 4036, 476, 5172, 3309, 821, 432, 2876, 7173, 7184	3.09972	1.03844
			Lysine degradation	1.18026	0.000855362	1892, 3033, 223, 4967, 6419, 1962, 55753, 217, 8424, 501, 38	3.53075	1.11818
			Sulfur metabolism	0.536481	0.00197843	54205, 23474, 7263, 9061, 6821	8.34541	2.56878
			Arginine and proline metabolism	1.07296	0.00249708	5832, 223, 4129, 8974, 2628, 217, 5033, 1152, 501, 4942	3.33816	3.23203
			Butanoate metabolism	0.751073	0.00444106	1892, 3033, 622, 65985, 1962, 54988, 38	4.32725	5.68105
			Mineral absorption	0.965665	0.00533568	4495, 4496, 4493, 55630, 4494, 4502, 476, 4501, 4499	3.2656	6.78874
			Pathways in cancer	3.96996	0.00631346	7849, 7704, 1029, 2335, 1950, 1026, 2770, 1050, 7040, 1030, 8772, 7424, 8325, 7423, 7046, 7184, 5228, 7855, 3673, 596, 637, 83439, 2308, 2122, 5743, 2263, 3091, 3815, 650, 1855, 7481, 355, 54205, 185, 54361, 2258, 5594	1.5714	7.98564
			Glycine, serine and threonine metabolism	0.858369	0.00752974	4129, 23464, 2731, 875, 1738, 1491, 2628, 501	3.42376	9.45466
			Pyruvate metabolism	0.858369	0.00867047	223, 32, 1738, 5160, 217, 501, 3945, 38	3.33816	10.8127
			Histidine metabolism	0.643777	0.0102249	220, 223, 4129, 443, 217, 501	4.35413	12.633
			TGF-beta signaling pathway	1.28755	0.0109007	64750, 7040, 1030, 353500, 3397, 3399, 650, 7046, 655, 4093, 4092, 5594	2.3844	13.4136
			Protein processing in endoplasmic reticulum	2.03863	0.0118536	10525, 1410, 10130, 10808, 9601, 596, 7466, 5611, 3309, 821, 9695, 57134, 10483, 9709, 64374, 1649, 573, 56605, 7184	1.87648	14.5034
			Insulin resistance	1.39485	0.027024	64764, 5588, 2308, 10891, 27330, 9882, 948, 7132, 32, 2673, 5563, 5837, 6195	2.00908	30.2322
			Glutathione metabolism	0.858369	0.0307401	2950, 2944, 2876, 2952, 2948, 2947, 2946, 2729	2.61817	33.6536
			Carbon metabolism	1.39485	0.0367254	9104, 3098, 1892, 4967, 4594, 2731, 1738, 4329, 5160, 1962, 55753, 34, 38	1.92018	38.84
			Axon guidance	1.50215	0.0394426	223117, 1969, 2051, 5058, 2770, 3985, 3983, 54910, 80031, 2047, 56924, 64218, 2049, 5594	1.83993	41.0686
			Chemical carcinogenesis	1.07296	0.0481633	220, 2950, 2944, 2952, 5743, 2052, 2948, 2947, 2946, 1545	2.08635	47.7245
			Proteoglycans in cancer	2.03863	0.0527831	7855, 3673, 3708, 3091, 2335, 5058, 960, 1026, 3693, 7481, 288, 4478, 355, 7040, 287, 8325, 54361, 5594, 5328	1.58563	50.9621
			Fc gamma R-mediated phagocytosis	1.07296	0.0622289	3985, 6850, 9846, 55616, 8936, 10810, 5058, 7408, 5594, 65108	1.987	57.0131
			Chronic myeloid leukemia	0.965665	0.0641819	7040, 2122, 6464, 9846, 1029, 53358, 1026, 7046, 5594	2.08635	58.1747
			Fatty acid metabolism	0.751073	0.0645575	1892, 3033, 1962, 36, 33, 34, 38	2.43408	58.3948
			Metabolism of xenobiotics by cytochrome P450	0.965665	0.0730259	220, 2950, 2944, 2952, 2052, 2948, 2947, 2946, 1545	2.02996	63.081
			Protein digestion and absorption	1.07296	0.0786726	6510, 59272, 3784, 1294, 3769, 1299, 6505, 3783, 5646, 476	1.89668	65.9294
			Cytokine-cytokine receptor interaction	2.14592	0.0934216	3597, 3590, 3815, 2690, 655, 1950, 4982, 27242, 7132, 51330, 355, 7040, 3976, 7424, 7423, 3977, 3556, 7046, 57007, 58985	1.45138	72.4398
Black	0.38	9e-12	Protein processing in endoplasmic reticulum	8.75912	1.64162e-07	10484, 9532, 3301, 80267, 7326, 9978, 56681, 23471, 3337, 6747, 3312, 54431	8.04346	0.000193695
			RNA transport	5.10949	0.00358643	80145, 8487, 79023, 51068, 4116, 81929, 5901	4.61018	4.15064
			Nucleotide excision repair	2.91971	0.00769587	1022, 54107, 8450, 9978	9.64074	8.71236
			Epstein-Barr virus infection	4.37956	0.0240239	1147, 5706, 7534, 3312, 5901, 9519	3.57722	24.9427
			Ubiquitin mediated proteolysis	3.64964	0.030669	8450, 7326, 9978, 6921, 7319	4.13426	30.7557
			Basal transcription factors	2.18978	0.0578456	1022, 6883, 9519	7.55191	50.493
			HTLV-I infection	4.37956	0.0704284	4893, 1147, 54107, 5901, 5534, 9519	2.65497	57.7556
